# Supplementary material for: Functional redundancy of Frizzled 3 and Frizzled 6 in planar cell polarity control of mouse hair follicles
Source: Oxford University Press journal article supplement (doi:10.1242/dev.168468), 2018-01-01
Supplement: dev168468supp.pdf [file dev168468supp.pdf]

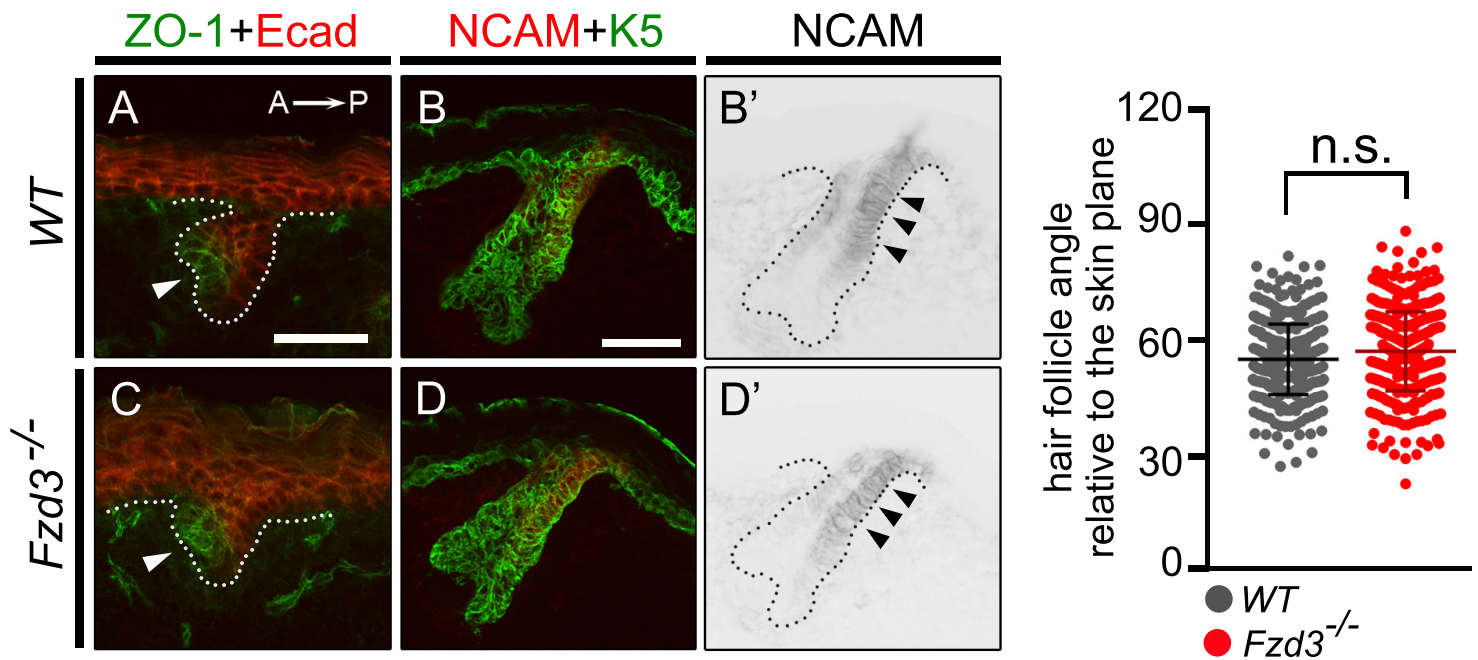

**Figure S1. Loss of *Fzd3* does not affect hair follicle polarity.**

Left, sagittal sections of E17.5 back skins stained with an anterior marker ZO-1 or posterior marker NCAM. E-cadherin and K5 antibodies were used to highlight skin epithelia and hair follicles. Anterior is to the left, and posterior is to the right. Scale bar, 50  $\mu$ m. Dotted lines outline the hair follicles.

Right, hair follicle angles to the plane of the skin were compared using the Student's t-test. WT, n = 456 hair follicles; *Fzd3*<sup>-/-</sup>, n = 408 hair follicles (n.s., not significant).

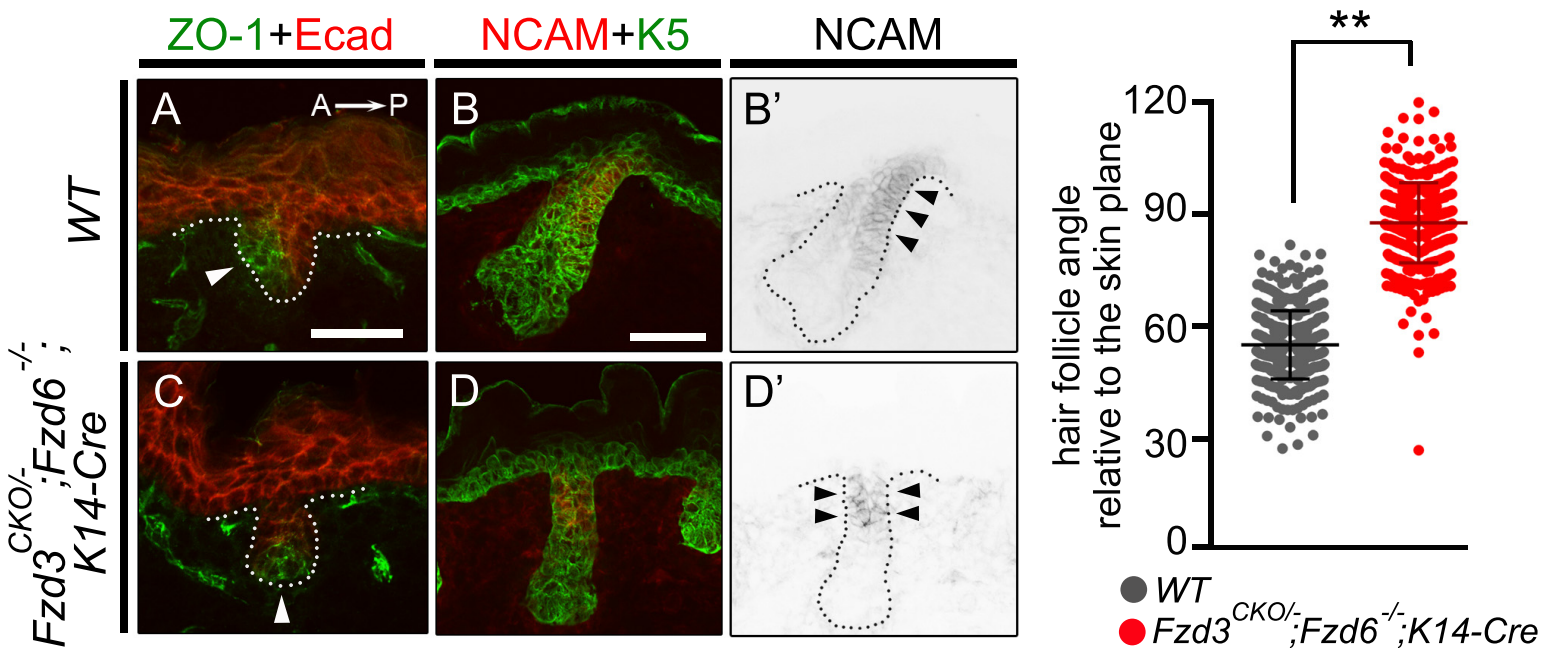

**Figure S2. Conditional knockout of *Fzd3* using K14-Cre on *Fzd6*<sup>-/-</sup> background recapitulates the skin phenotype of *Fzd3*<sup>-/-</sup>;*Fzd6*<sup>-/-</sup> mice.**

Left, sagittal sections of E17.5 back skins stained with an anterior marker ZO-1 or posterior marker NCAM. E-cadherin and K5 antibodies were used to highlight skin epithelia and hair follicles. In  $Fzd3^{CKO/-};Fzd6^{-/-};K14-Cre$  skin, hair follicles are perpendicular to the skin surface, and the asymmetric localization of ZO-1 and NCAM is lost (similar to  $Fzd3^{-/-};Fzd6^{-/-}$  mice). Anterior is to the left, and posterior is to the right. Scale bar, 50  $\mu$ m. Dotted lines outline the hair follicles.

Right, hair follicle angles to the plane of the skin were compared using the Student's t-test. WT, n = 456 hair follicles;  $Fzd3^{CKO/-};Fzd6^{-/-};K14-Cre$ , n = 431 hair follicles (\*\*,  $P < 0.01$ ).

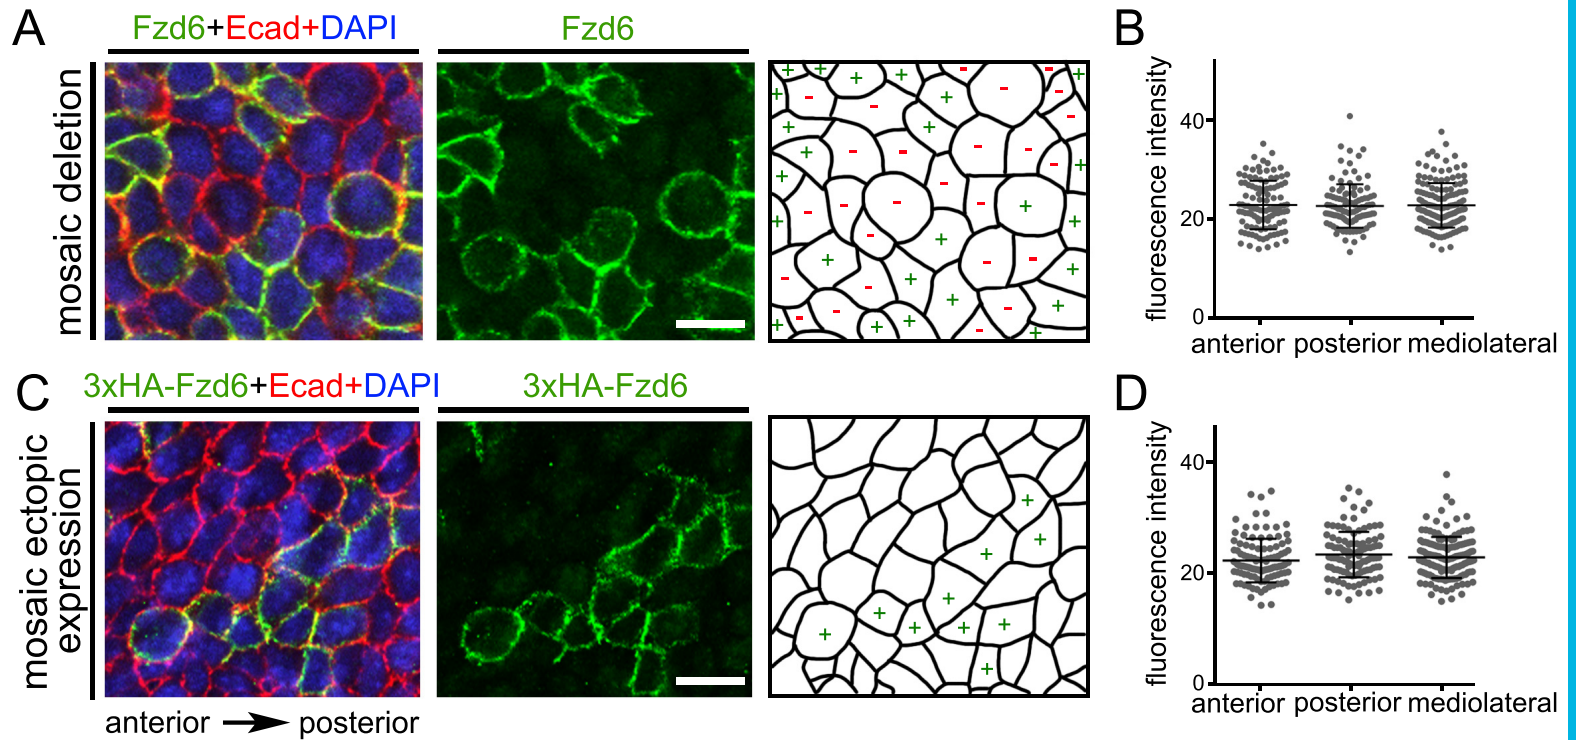

**Figure S3. Localization of Fzd6 in individual skin epithelial cells at E16.5 by genetic mosaic labeling.**

(A) Mosaic expression of Fzd6 was induced in *Fzd6*<sup>CKO/-</sup>; *CAGG-CreER*<sup>TM</sup> embryos treated with 4-HT at E10.5. E16.5 back skins were collected and stained with Fzd6 (green) and E-cadherin (red) antibodies. The right panel shows the schematic of the *Fzd6* (+) versus *Fzd6* (-) cells.

(B) Quantification of fluorescence intensity on anterior, posterior, and mediolateral sides of the cells at the borders of *Fzd6* (+) and *Fzd6* (-) clones.

(C) Mosaic expression of 3xHA-tagged Fzd6 on a WT background was induced in *Rosa26-LSL-Fzd6*; *CAGG-CreER*<sup>TM</sup> embryos treated with 4-HT at E10.5. E16.5 back skins were collected and stained with 3xHA (green) and E-cadherin (red) antibodies. The right panel shows the schematic of the *3xHA-Fzd6* (+) versus WT cells.

(D) Quantification of fluorescence intensity on anterior, posterior, and mediolateral sides of the cells at the borders of *3xHA-Fzd6* (+) and WT clones.

Anterior is to the left and posterior to the right. Scale bar, 10  $\mu$ m.

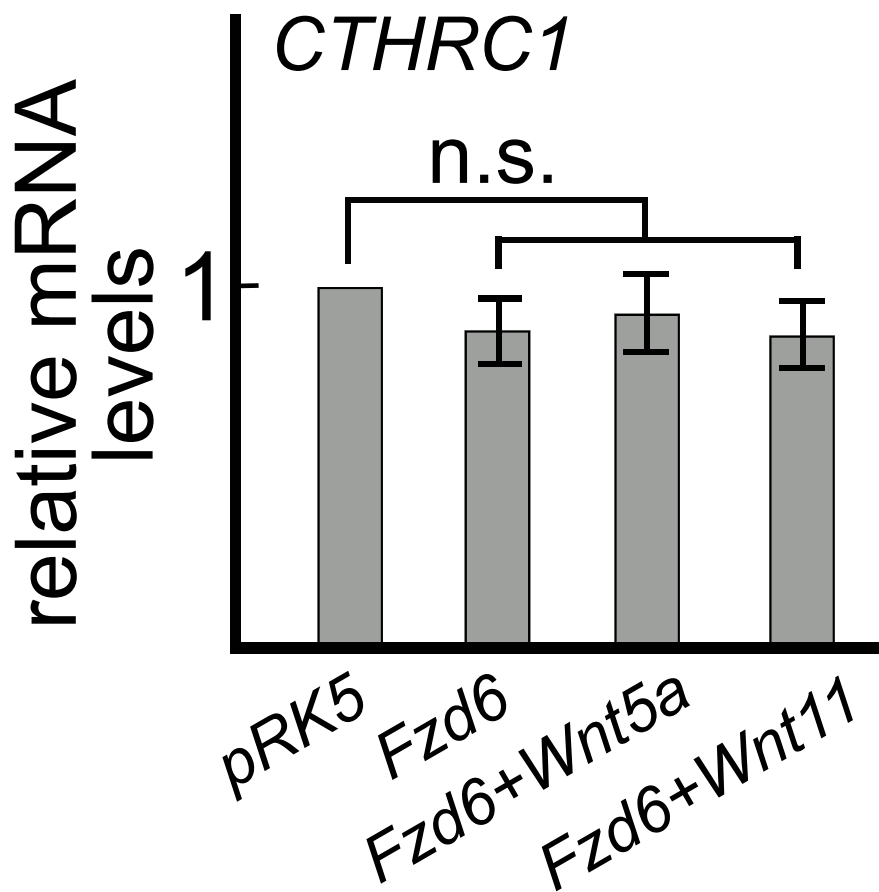

**Figure S4. Transient expression of Fzd6 is not sufficient to drive *CTHRC1* expression *in vitro*.** qRT-PCR shows no significant change in *CTHRC1* mRNA level in HEK293T cells transiently transfected with Fzd6, with or without the presence of recombinant Wnt5a or Wnt11 protein (100 ng/ml). All data represent mean  $\pm$  SEM of three biological replicates. *GAPDH* was used as a control. Quantification of data was compared using ANOVA followed by Dunnett's test (n.s., not significant).

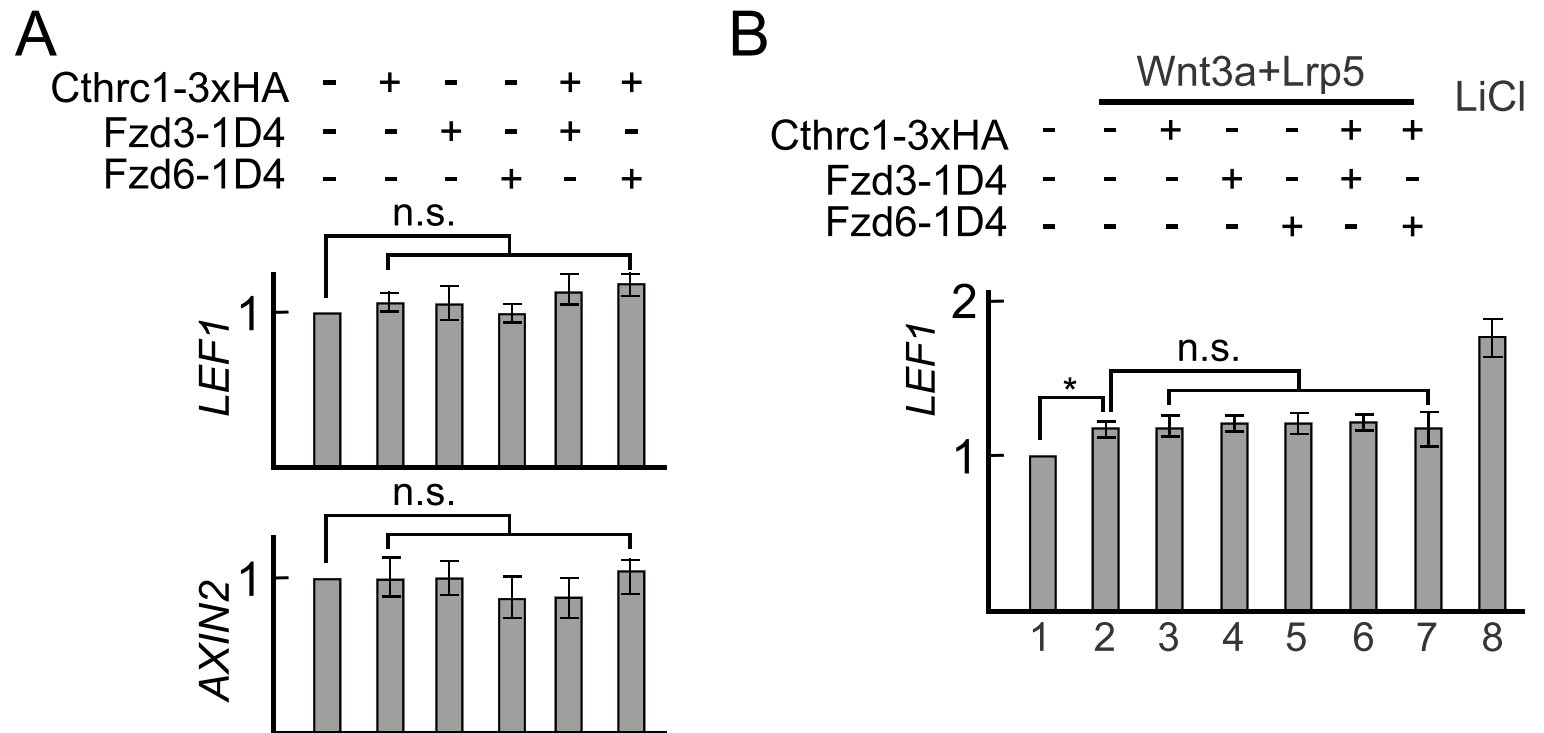

**Figure S5. Cthrc1-Fzd3/6 does not affect canonical Wnt signaling pathway *in vitro*.**

(A) Transient expression of Fzd3/6 only, Cthrc1 only, or both Fzd3/6 and Cthrc1 does not affect the basal level of canonical Wnt signaling in HEK293T cells, as qRT-PCR shows no significant changes in mRNA level of known canonical Wnt signaling targets (*LEF1* and *AXIN2*).

(B) Recombinant Wnt3a together with the transient transfection of Lrp5 induces a significant increase of *LEF1* expression in HEK293T cells (17%, column 2 vs. 1), as compared to the 20 mM LiCl treatment (76%, column 8 vs. 1). Transient expression of Fzd3/6 only, Cthrc1 only, or both Fzd3/6 and Cthrc1 does not affect the *LEF1* expression induced by Wnt3a+Lrp5. The data represent mean  $\pm$  SEM of three biological replicates. *GAPDH* as a control. Quantification of data was compared using ANOVA followed by Dunnett's or Tukey's test (\*,  $P < 0.05$ ; n.s., not significant).

**Table S1. Primers used for RT-PCR and quantitative real-time RT-PCR**

| <b>Gene Symbol</b> | <b>Forward Primer</b>          | <b>Reverse Primer</b>          |
|--------------------|--------------------------------|--------------------------------|
| <i>mFzd3</i>       | 5' -ATGGCTGTGAGCTGGATTGTC-3'   | 5' -GGCACATCCTCAAGGTTATAGGT-3' |
| <i>mFzd6</i>       | 5' -ATGGAAAGGTCCCGTTTCGTG-3'   | 5' -GGGAAGAACGTCATGTTGTAAGT-3' |
| <i>mSdc2</i>       | 5' -TGTGTCCGCAGAGACGAGAA-3'    | 5' -GGAATCAGTTGGGATGTTGTCA-3'  |
| <i>mH21Rik</i>     | 5' -TTTCAGCATTCGGTGTCTTT-3'    | 5' -GGTGGGTAGTAGGGTGGAGAATA-3' |
| <i>mGlipr2</i>     | 5' -ATGGGCAAATCAGCTTCCAAA-3'   | 5' -GCTTCCCGTTGAGCTTCTT-3'     |
| <i>mCthrc1</i>     | 5' -CAGTTGTCCGCACCGATCA-3'     | 5' -GGTCCTTGTAGACACATTCCATT-3' |
| <i>mSerhl</i>      | 5' -ATGGGTTTGCCTCAGAGTTG-3'    | 5' -GCCAGCCGTGTAAGCAGAG-3'     |
| <i>mKrt13</i>      | 5' -TCATCTCGGTTTGTCACTGGA-3'   | 5' -TGATCTTCTCGTTGCCAGAGAG-3'  |
| <i>mPsc</i>        | 5' -GGACCAGCACAGTTGCTTTAC-3'   | 5' -GTAGTTCTCCGAGTCATCCTCA-3'  |
| <i>mGAPDH</i>      | 5' -AGGTCGGTGTGAACGGATTG-3'    | 5' -TGTAGACCATGTAGTTGAGGTCA-3' |
| <i>hCTHRC1</i>     | 5' -CAATGGCATTCCGGGTACAC-3'    | 5' -GTACACTCCGCAATTTTCCCAA-3'  |
| <i>hLEF1</i>       | 5' -TGCCAAATATGAATAACGACCCA-3' | 5' -GAGAAAAGTCTCGTCACTGT-3'    |
| <i>hAXIN2</i>      | 5' -TACACTCCTTATTGGCCGATCA-3'  | 5' -TTGGTACTCGTAAAGTTTTGGT-3'  |
| <i>hGAPDH</i>      | 5' -CTGGGCTACACTGAGCACC-3'     | 5' -AAGTGGTCGTTGAGGGCAATG-3'   |
| <i>hWNT1</i>       | 5' -TTCAGACACGAGAGATGGAAC-3'   | 5' -CCAGCCTTCACTTGCTGAG-3'     |
| <i>hWNT2</i>       | 5' -CCGAGGTCAACTCTTCATGGT-3'   | 5' -CCTGGCACATTATCGCACAT-3'    |
| <i>hWNT2B</i>      | 5' -GGGGCACGAGTGATCTGTG-3'     | 5' -GCATGATGTCTGGGTAACGCT-3'   |
| <i>hWNT3</i>       | 5' -CTCGCTGGCTACCCAATTTG-3'    | 5' -AGGCTGTCATCTATGGTGGTG-3'   |
| <i>hWNT3A</i>      | 5' -AGCTACCCGATCTGGTGGTC-3'    | 5' -CAAACCTCGATGTCCTCGTAC-3'   |
| <i>hWNT4</i>       | 5' -AGGAGGAGACGTGCGAGAAA-3'    | 5' -CGAGTCCATGACTTCCAGGT-3'    |
| <i>hWNT5A</i>      | 5' -ATTCTTGGTGGTCGCTAGGTA-3'   | 5' -CGCCTTCTCCGATGTACTGC-3'    |
| <i>hWNT5B</i>      | 5' -GCTTCTGACAGACGCCAACT-3'    | 5' -CACCGATGATAAACATCTCGGG-3'  |
| <i>hWNT6</i>       | 5' -GGCAGCCCTTGGTTATGG-3'      | 5' -CTCAGCCTGGCACAACCTCG-3'    |
| <i>hWNT7A</i>      | 5' -CTGTGGCTGCGACAAAGAGAA-3'   | 5' -GCCGTGGCACTTACATTCC-3'     |
| <i>hWNT7B</i>      | 5' -CACAGAACTTTTCGCAAGTGG-3'   | 5' -GTACTGGCACTCGTTGATGC-3'    |
| <i>hWNT8A</i>      | 5' -GAACCTGTTTATGCTCTGGGC-3'   | 5' -CAGCGTTCCCAAGCAAACCTG-3'   |
| <i>hWNT8B</i>      | 5' -CCGACACCTTTCGCTCCATC-3'    | 5' -CAGCCCTAGCGTTTGTGTTCTC-3'  |
| <i>hWNT9A</i>      | 5' -AGCAGCAAGTTCGTCAAGGAA-3'   | 5' -CCTTACACCCACGAGGTTG-3'     |
| <i>hWNT9B</i>      | 5' -TGTGCGGTGACAACCTCAAG-3'    | 5' -ACAGGAGCCTGATACGCCAT-3'    |
| <i>hWNT10A</i>     | 5' -GGTCAGCACCCAATGACATTC-3'   | 5' -TGGATGGCGATCTGGATGC-3'     |
| <i>hWNT10B</i>     | 5' -CATCCAGGCACGAATGCCA-3'     | 5' -CGGTTGTGGGTATCAATGAAGA-3'  |
| <i>hWNT11</i>      | 5' -GGAGTCGGCCTTCGTGTATG-3'    | 5' -GCCCGTAGCTGAGGTTGTC-3'     |
| <i>hWNT16</i>      | 5' -TTCAGACACGAGAGATGGAAC-3'   | 5' -CCAGCCTTCACTTGCTGAG-3'     |
